# Supplementary material for: The midbody interactome reveals unexpected roles for PP1 phosphatases in cytokinesis
Source: PubMed Central journal article supplement (PMC6778137; doi:10.1038/s41467-019-12507-9), 2019-10-04
Supplement: 41467_2019_12507_MOESM1_ESM.pdf [file 41467_2019_12507_MOESM1_ESM.pdf]

Supplementary Information for:

**The midbody interactome reveals unexpected roles for PP1 phosphatases in  
cytokinesis**

by

Capalbo et al.

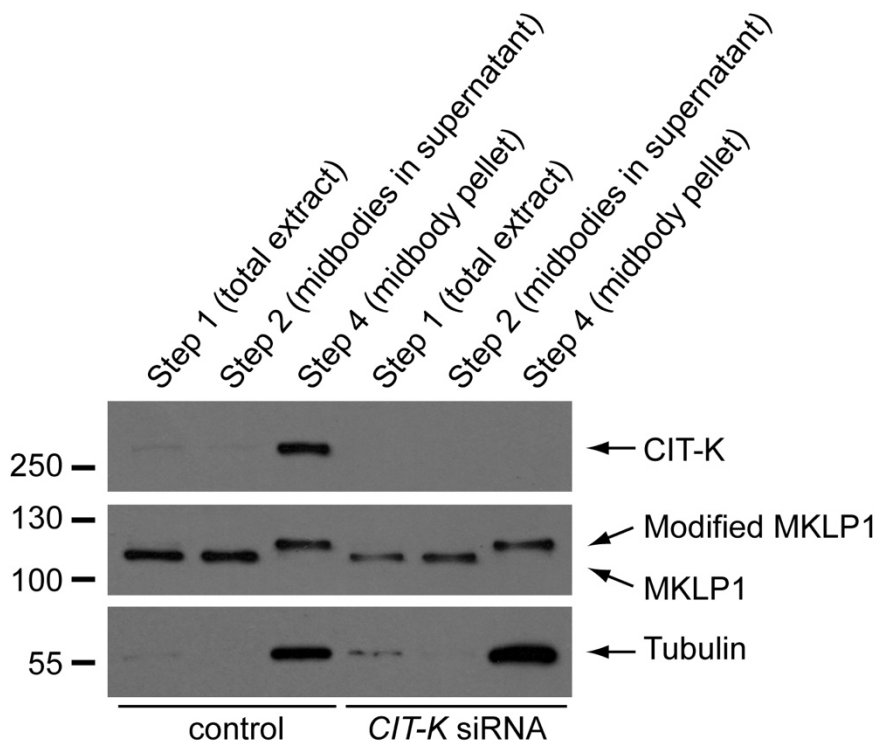

**Supplementary Figure 1. Purified midbodies are enriched for known midbody proteins.** HeLa cells treated with siRNAs directed against either a random sequence (control) or *CIT-K* were synchronized in telophase to purify midbodies and aliquots from the different purification steps (see Materials and Methods) were analyzed by Western blot to detect CIT-K, MKLP1 and tubulin. The numbers on the left indicate the sizes in kDa of the molecular mass marker. Note that the slower migrating band detected with the anti-MKLP1 antibody is very likely a post-translational modified form of MKLP1. Source data for Supplementary Figure S1 are provided as a Source Data file.

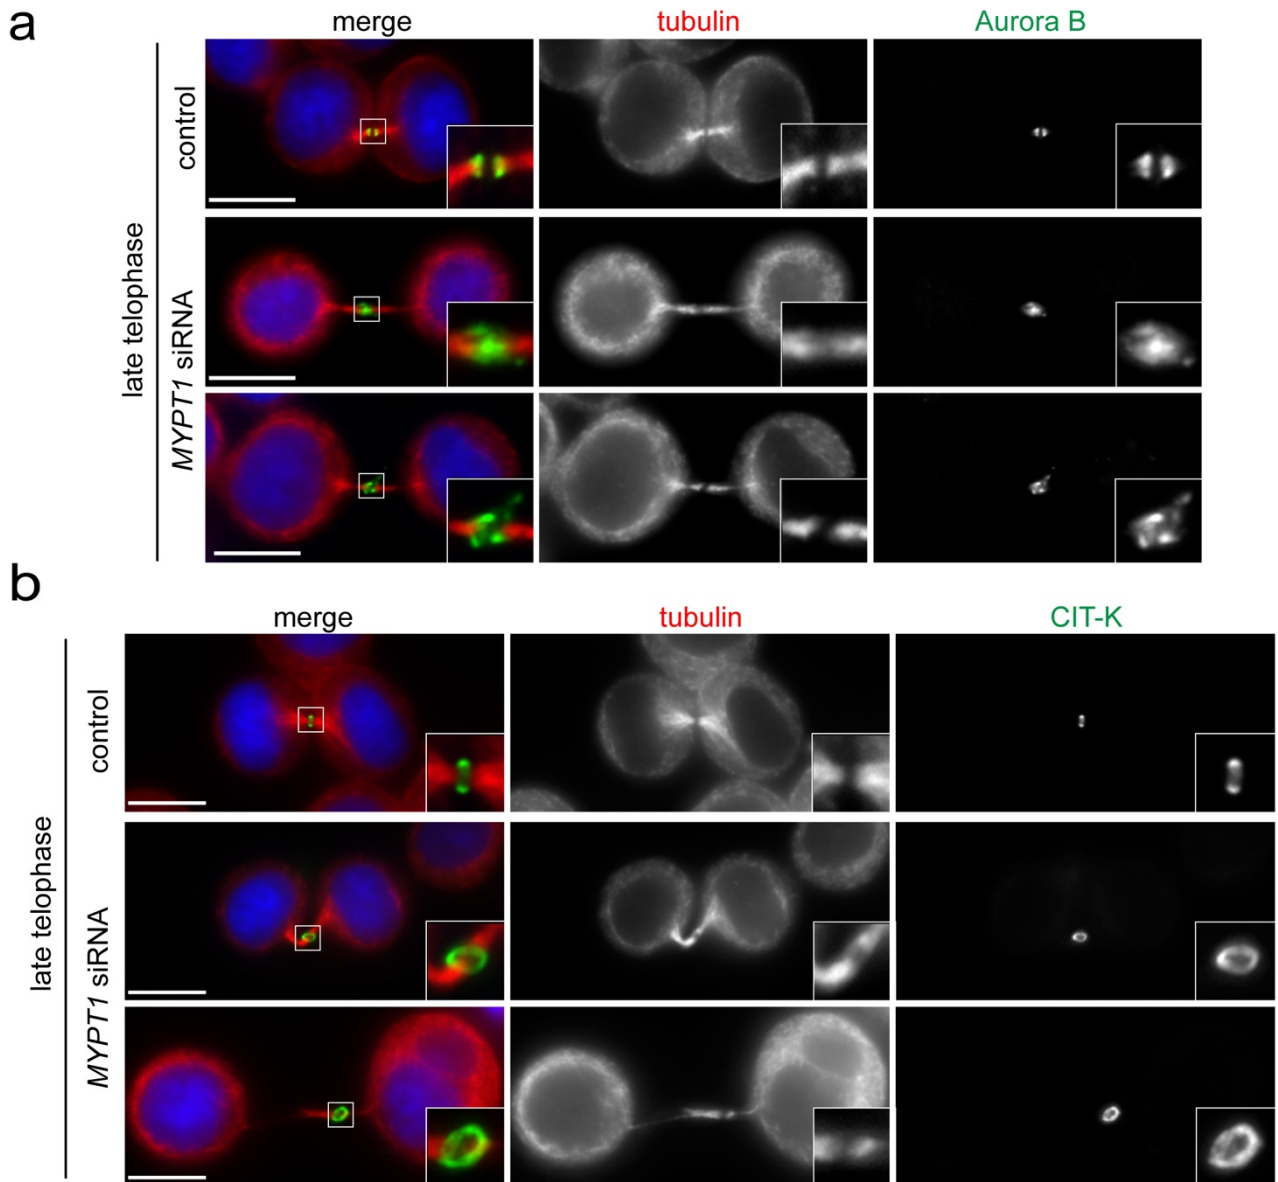

**Supplementary Figure 2. Analysis of cytokinesis defects after MYPT1 depletion in HeLa S3 cells.** (a-b) HeLa S3 cells were treated with siRNAs directed against either a random sequence (control) or *MYPT1* and after 48 hours were fixed and stained to detect DNA (blue in the merged panels), tubulin, and either Aurora B (a) or CIT-K (b). DNA condensation and the shape and thickness of microtubule bundles at the intercellular bridge were used as criteria to stage telophase cells. Insets show a 3x magnification of the midbody. Bars, 10  $\mu$ m.

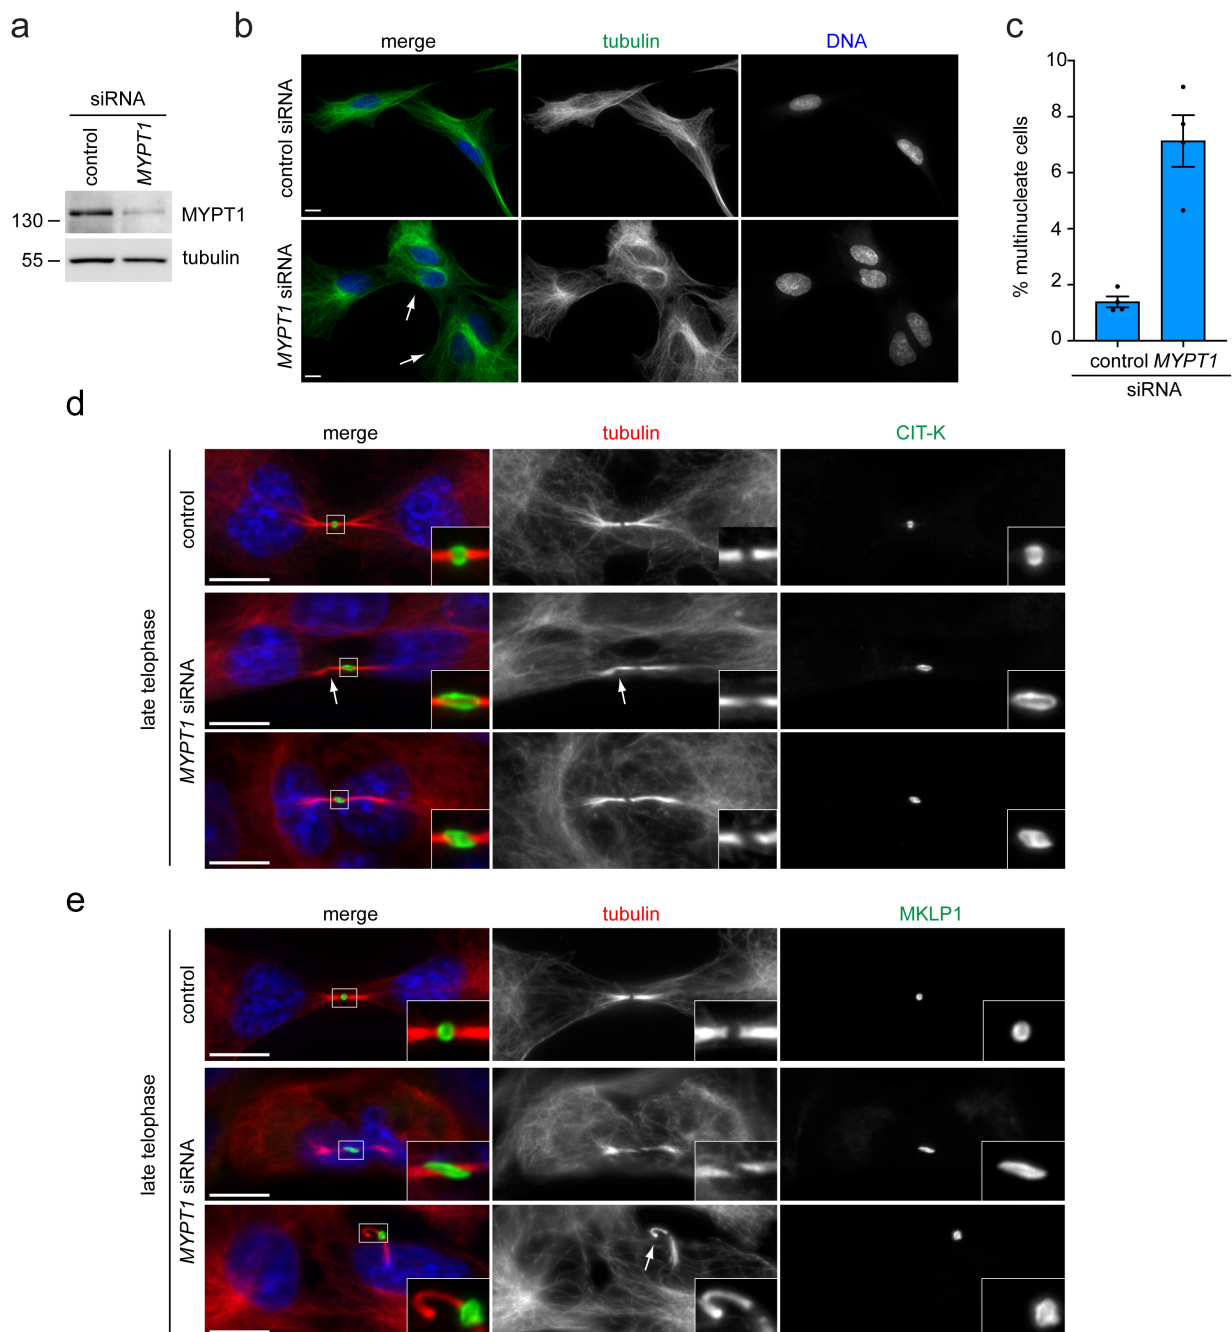

**Supplementary Figure 3. Analysis of cytokinesis defects after MYPT1 depletion in RPE-1 cells.** (a) RPE-1 cells were treated with siRNAs directed against either a random sequence (control) or MYPT1 and after 48 h proteins were extracted and analyzed by Western blot to detect the indicated proteins. The numbers on the left indicate the sizes in kDa of the molecular mass marker. (b) RPE-1 cells were treated with siRNAs directed against either a random sequence (control) or MYPT1 and after 48 hours were fixed and stained to detect DNA and tubulin. The arrows indicate multinucleate cells. Bars, 10  $\mu$ m. (c) Quantification of multinucleate cells obtained after control or MYPT1 siRNA. More than 700 biologically independent cells were counted in n=4 independent experiments. Bars indicate standard errors. (d-e) RPE-1 cells were treated with control or MYPT1 siRNAs and after 48 hours were fixed and stained to detect the indicated epitopes and DNA (blue in the merged panels). DNA condensation and the shape and thickness of microtubule bundles at the intercellular bridge were used as criteria to stage telophase cells. Insets show a 3x magnification of the midbody. The arrows mark a bent (d) and a broken (e) central spindle, phenotypes that are very similar to those observed in HeLa cells (Fig. 6). Bars, 10  $\mu$ m. Source data for Supplementary Figure 3a and 3c are provided as a Source Data file.

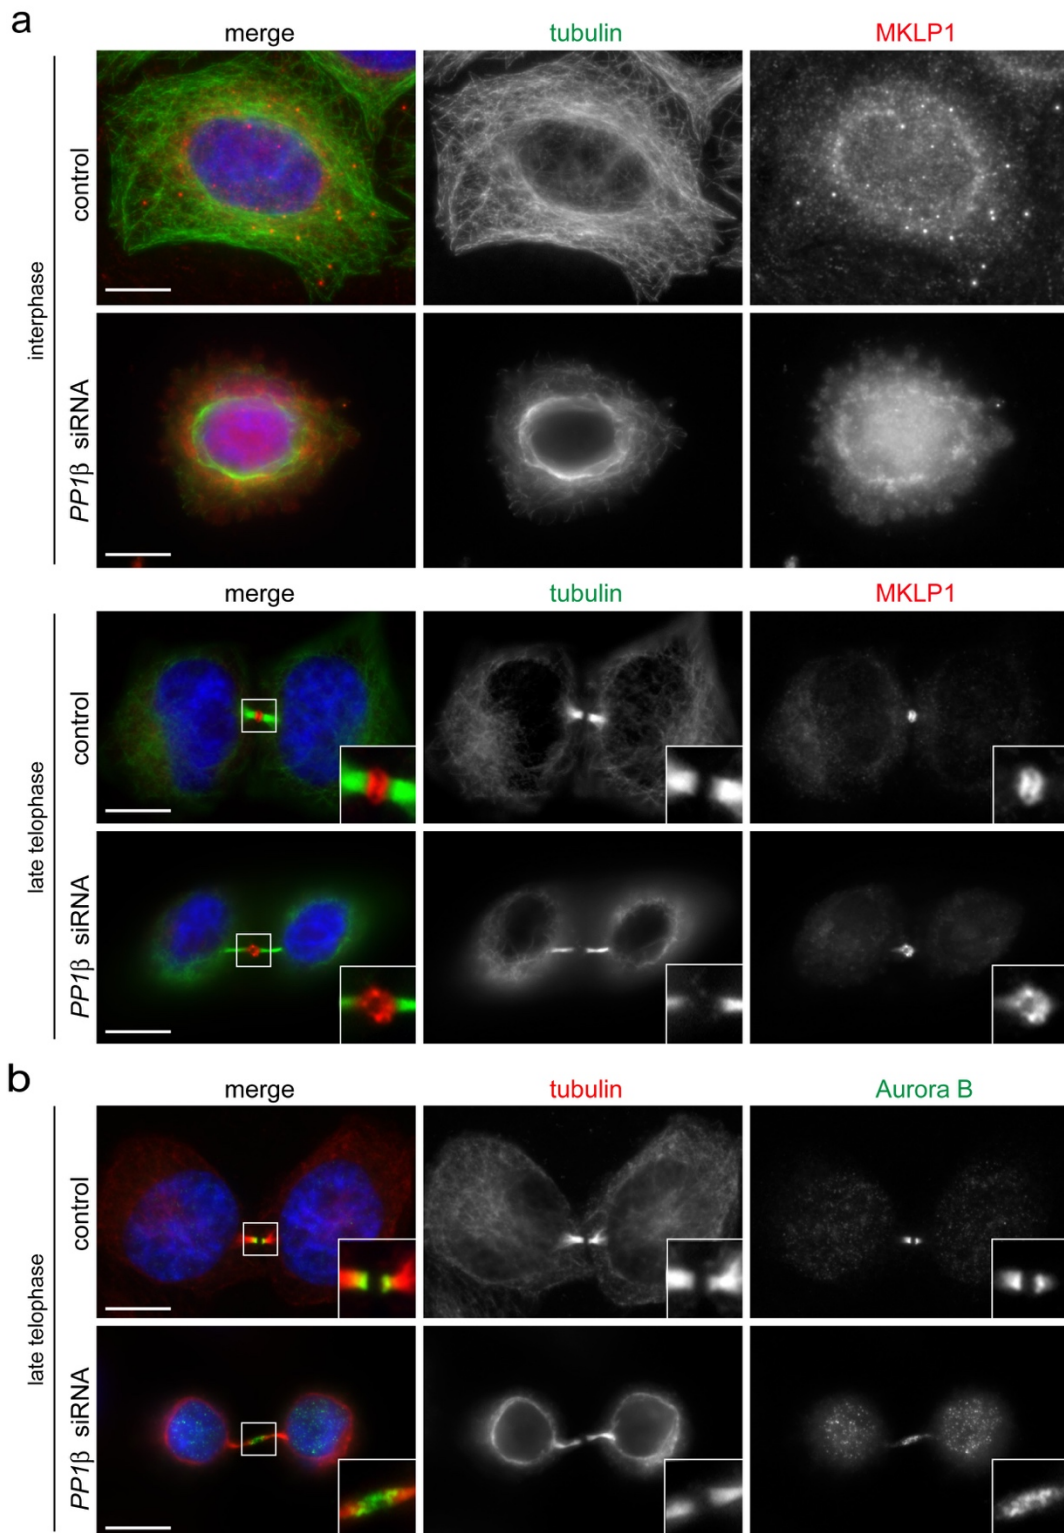

**Supplementary Figure 4. *PP1β* siRNA phenocopies MYPT1 depletion.** (a-b) HeLa Kyoto cells were treated with siRNAs directed against either a random sequence (control) or *PP1β* and after 48 hours were fixed and stained to detect DNA (blue in the merged panels), tubulin and either MKLP1 (a) or Aurora B (b). DNA condensation and the shape and thickness of microtubule bundles at the intercellular bridge were used as criteria to stage telophase cells. Insets show a 3x magnification of the midbody. Bars, 10  $\mu$ m.

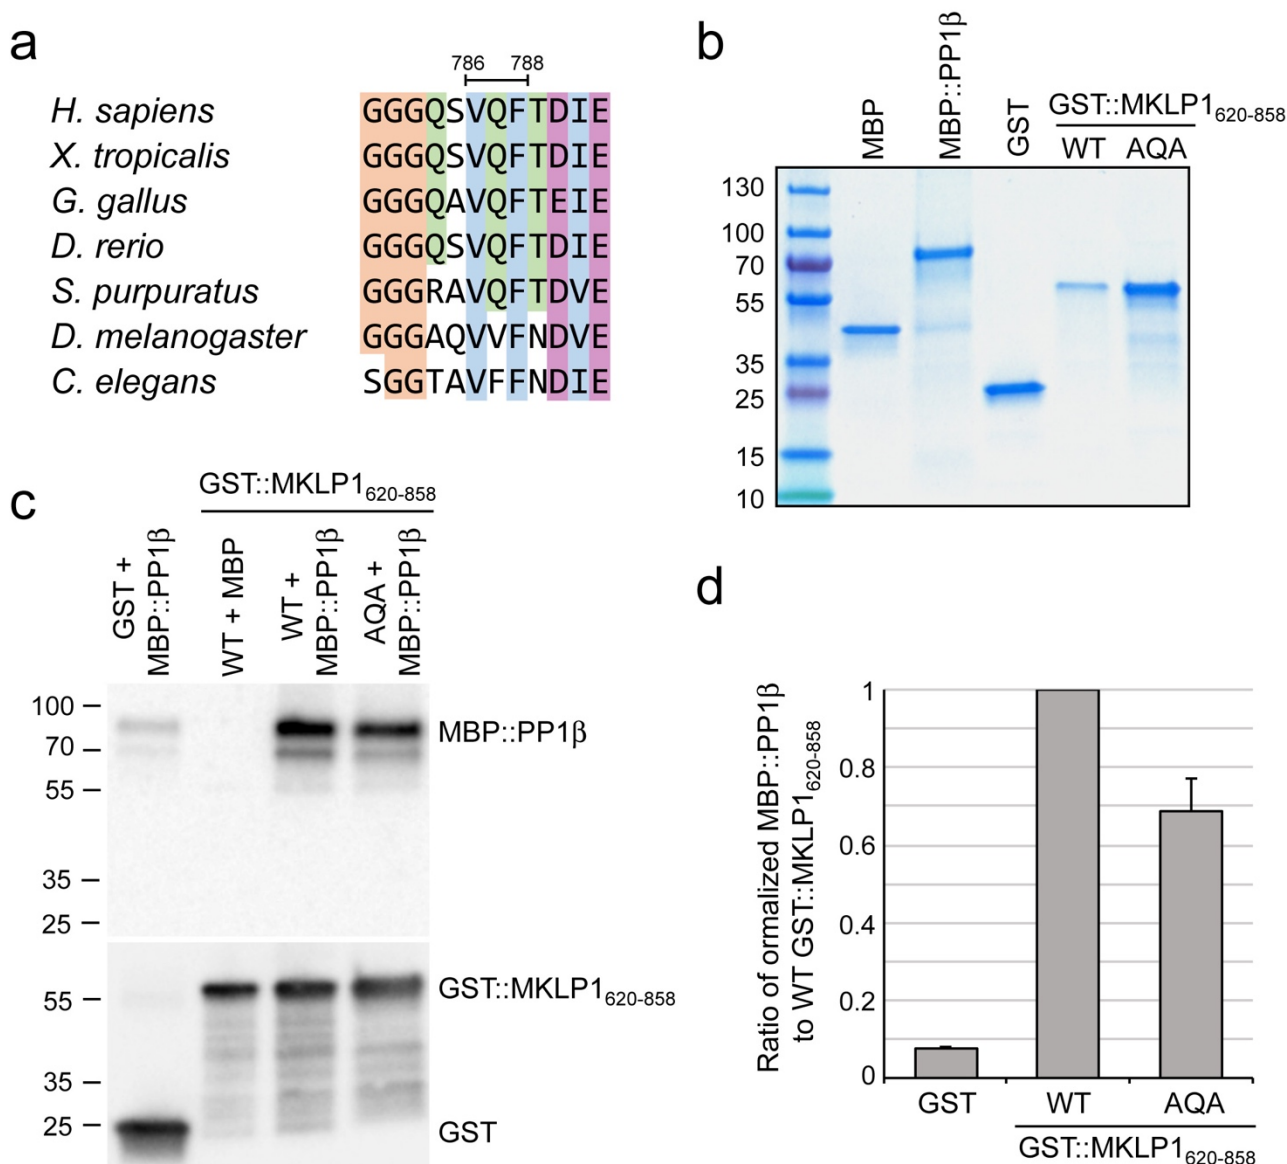

**Supplementary Figure 5. PP1 $\beta$  interacts with a conserved binding site in the MKLP1 C-terminus.**

(a) The amino acid sequences containing the PP1 $\beta$  binding site (aa 786-788) of human MKLP1 and its orthologues in other vertebrate and invertebrate species were aligned using the Muscle algorithm<sup>1</sup>. Amino acids are colored according to their chemical properties. (b) Coomassie-stained gel showing the purified proteins used in the GST pull down assay. (c) GST-tagged wild type and AQA mutant MKLP1 fragments (aa 620-858) were expressed and purified in bacteria and then employed in a pull down assay with MBP:: PP1 $\beta$  or MBP alone purified from yeast. Proteins were then analyzed by Western blot using antibodies against MBP (top) and GST (bottom). (d) Graph showing the quantification of the levels of MBP:: PP1 $\beta$  normalized against their respective GST baits and the ratio of these values relative to WT GST:: MKLP1<sub>620-858</sub>; n= 2 independent experiments. Bars indicate standard errors. Source data for Supplementary Figure 5c and 5d are provided as a Source Data file.

**Supplementary Table 1. List of the proteins showing differential abundance at the midbody after CIT-K depletion.**

| Gene    | Protein                                                       | log <sub>2</sub> ratio exp. 1 | log <sub>2</sub> ratio exp. 2 | p-value exp. 1       | p-value exp. 2         |
|---------|---------------------------------------------------------------|-------------------------------|-------------------------------|----------------------|------------------------|
| CIT-K   | Citron kinase                                                 | -2.69                         | -2.47                         | 2x10 <sup>-45</sup>  | 1.4x10 <sup>-25</sup>  |
| PC      | Pyruvate carboxylase, mitochondrial                           | -0.80                         | -0.86                         | 3x10 <sup>-9</sup>   | 3.9x10 <sup>-4</sup>   |
| ASS1    | Argininosuccinate synthase                                    | -0.52                         | -0.63                         | 7.6x10 <sup>-5</sup> | 5.5x10 <sup>-4</sup>   |
| FLNB    | Filamin B                                                     | -0.50                         | -0.56                         | 1.2x10 <sup>-4</sup> | 2.1x10 <sup>-3</sup>   |
| TIMM44  | Mitochondrial import inner membrane translocase subunit TIM44 | -0.40                         | -1.04                         | 1.4x10 <sup>-3</sup> | 1.82x10 <sup>-5</sup>  |
| PPIB    | Peptidyl-prolyl cis-trans isomerase B                         | -0.37                         | -0.57                         | 3.1x10 <sup>-3</sup> | 1.8x10 <sup>-3</sup>   |
| AURKA   | Aurora kinase A                                               | 0.45                          | 0.69                          | 5x10 <sup>-3</sup>   | 2.6x10 <sup>-4</sup>   |
| CKAP2   | Cytoskeleton-associated protein 2                             | 0.45                          | 0.67                          | 5x10 <sup>-3</sup>   | 3.7x10 <sup>-4</sup>   |
| PTPRF   | Receptor-type tyrosine-protein phosphatase F                  | 0.62                          | 1.19                          | 2.3x10 <sup>-3</sup> | 9.71x10 <sup>-10</sup> |
| TPX2    | Targeting protein for Xklp2                                   | 0.71                          | 0.75                          | 4.3x10 <sup>-6</sup> | 6.65x10 <sup>-5</sup>  |
| HNRNPH3 | Heterogeneous nuclear ribonucleoprotein H3                    | 0.83                          | 0.97                          | 3.2x10 <sup>-5</sup> | 5.47x10 <sup>-7</sup>  |
| KIFC1   | Kinesin-like protein KIFC1                                    | 0.87                          | 0.55                          | 1.5x10 <sup>-5</sup> | 3.3x10 <sup>-3</sup>   |

Proteins that were significantly less or more abundant ( $p$  value<0.01; significance B test corrected by Benjamini-Hochberg method) in CIT-K siRNA midbodies are listed. The corresponding normalized logarithmic ratios and corrected p-values from experiment 1 and experiment 2 are shown. Proteins shaded in blue were underrepresented (negative logarithmic ratios) after CIT-K depletion. Proteins shaded in red were overrepresented (positive logarithmic ratios).

**Supplementary Table 2. List of the serine/threonine phosphatases present in the midbody interactome.**

| Baits               | Anillin               | Aurora B            | CHMP4B              | CHMP4C              | CIT-K                 | ECT2                 | KIF14                | KIF20A               | KIF23/<br>MKLP1     | PRC1                  | Proteome |
|---------------------|-----------------------|---------------------|---------------------|---------------------|-----------------------|----------------------|----------------------|----------------------|---------------------|-----------------------|----------|
| PPP1CA              | Score 183<br>Pept 5   |                     |                     | Score 244<br>Pept 6 | Score 1392<br>Pept 21 | Score 400<br>Pept 9  | Score 658<br>Pept 10 | Score 303<br>Pept 8  | Score 75<br>Pept 3  | Score 1004<br>Pept 16 | Yes      |
| PPP1CB              |                       |                     |                     |                     | Score 1312<br>Pept 19 | Score 342<br>Pept 8  | Score 85<br>Pept 1   | Score 253<br>Pept 6  |                     | Score 963<br>Pept 14  | No       |
| PPP1CC              | Score 267<br>Pept 9   | Score 117<br>Pept 1 | Score 302<br>Pept 6 |                     | Score 1355<br>Pept 20 | Score 338<br>Pept 8  | Score 690<br>Pept 12 | Score 407<br>Pept 6  | Score 68<br>Pept 2  | Score 1067<br>Pept 19 | Yes      |
| PPP1R9A             | Score 235<br>Pept 3   |                     | Score 120<br>Pept 2 | Score 83<br>Pept 3  |                       | Score 254<br>Pept 4  | Score 67<br>Pept 1   | Score 48<br>Pept 1   |                     | Score 78<br>Pept 1    | No       |
| PPP1R9B             | Score 237<br>Pept 5   |                     | Score 285<br>Pept 6 |                     |                       | Score 340<br>Pept 7  | Score 273<br>Pept 5  | Score 94<br>Pept 1   | Score 98<br>Pept 2  |                       | No       |
| PPP1R12A<br>(MYPT1) | Score 185<br>Pept 2   |                     | Score 197<br>Pept 3 | Score 60<br>Pept 5  | Score 572<br>Pept 6   | Score 363<br>Pept 11 | Score 855<br>Pept 15 | Score 152<br>Pept 5  |                     | Score 564<br>Pept 13  | Yes      |
| PPP1R12B            | Score 87<br>Pept 1    |                     |                     |                     |                       |                      | Score 83<br>Pept 1   |                      |                     |                       | No       |
| PPP1R12C            |                       |                     |                     |                     |                       |                      | Score 346<br>Pept 4  | Score 87<br>Pept 1   |                     | Score 56<br>Pept 1    | No       |
| PPP1R18             | Score 96<br>Pept 1    |                     | Score 128<br>Pept 1 |                     | Score 85<br>Pept 1    | Score 232<br>Pept 4  | Score 400<br>Pept 8  | Score 201<br>Pept 7  |                     |                       | No       |
| PPP1R13L            |                       |                     |                     |                     |                       |                      | Score 101<br>Pept 2  | Score 222<br>Pept 2  |                     |                       | Yes      |
| PPP2CA              |                       |                     |                     | Score 38<br>Pept 1  |                       |                      |                      |                      |                     |                       | No       |
| PPP2R5A             |                       |                     |                     | Score 24<br>Pept 3  | Score 107<br>Pept 2   |                      | Score 34<br>Pept 1   |                      |                     | Score 98<br>Pept 2    | Yes      |
| PPP2R1B             |                       |                     |                     |                     |                       |                      |                      |                      |                     | Score 46<br>Pept 1    | Yes      |
| PPP3CA              |                       |                     | Score 61<br>Pept 1  |                     |                       | Score 63<br>Pept 1   |                      |                      |                     |                       | No       |
| MPRIP               | Score 1358<br>Pept 23 |                     | Score 390<br>Pept 6 | Score 43<br>Pept 3  | Score 66<br>Pept 1    | Score 179<br>Pept 6  | Score 528<br>Pept 10 | Score 432<br>Pept 5  | Score 85<br>Pept 2  |                       | No       |
| CDC25A              |                       | Score 48<br>Pept 9  |                     |                     | Score 39<br>Pept 3    |                      |                      |                      |                     | Score 35<br>Pept 1    | No       |
| PGAM5               | Score 359<br>Pept 11  |                     | Score 75<br>Pept 2  | Score 108<br>Pept 4 | Score 61<br>Pept 4    | Score 74<br>Pept 3   | Score 430<br>Pept 13 | Score 372<br>Pept 13 | Score 171<br>Pept 6 | Score 101<br>Pept 2   | Yes      |

The baits are listed in the top row and the phosphatases in the far left column. Protein names are according to the UniProt database. Member of the PP1 family are shaded in green, while members of the PP2 family are shaded in red. The Mascot score (Score) and number of peptides (Pept) identified in each AP-MS experiment are indicated. The far-right column indicates whether the phosphatase was identified in the midbody proteome.



**Supplementary Table 3. List of the oligonucleotides used in the experiments.**

| Name                    | Sequence 5'-3'                                                           | Purpose                                     |
|-------------------------|--------------------------------------------------------------------------|---------------------------------------------|
| PP1beta GST-pre yst for | TCCAAAATCGGATCTGGAAGTTCTGTTCCAGGGGC<br>CCCTGATGGCGGACGGGGAGCTGAACGTGG    | Plasmid to express GST-PP1 $\beta$ in yeast |
| PP1beta yst rev         | CGGTTAGAGCGGATCTTAGCTAGCCGCGGTACCA<br>AGCTTATCACTTTTCTTCGGCGGATTAGCT     |                                             |
| MBPMKLP1 yst for        | GAAAGACGCGCAGACTACGACCGAAAACCTGTAT<br>TTTCAGTCCATGAAGTCAGCGAGAGCTAAGACAC | Plasmid to express MBP-MKLP1 in yeast       |
| MKLP1 yst rev           | CGGTTAGAGCGGATCTTAGCTAGCCGCGGTACCA<br>AGCTTATCATGGCTTTTTGCGCTTGGGTTGT    |                                             |
| MBPPP1beta yst for      | GAAAGACGCGCAGACTACGACCGAAAACCTGTAT<br>TTTCAGTCCATGGCGGACGGGGAGCTGAACGTGG | Plasmid to express MBP-PP1 $\beta$ in yeast |
| MKLP1 AQA mutant primer | ATTAAGGGTGATATTTATAAAACAAGGGTGGTG<br>GACAATCTGCTCAGGCTACTGATATT          | To mutate the VQF residues to AQA in MKLP1  |
| PP1beta D94N for        | CTATCTTTTCTTAGGAAATTATGTGGACAGAG                                         | To generate the PP1 $\beta$ -dead mutant    |
| PP1beta D94N rev        | CTCTGTCCACATAATTCCTAAGAAAAGATAG                                          |                                             |
| PP1beta H124N for       | CTCTTAAGAGGAAACAATGAGTGTGCTAGCATC                                        |                                             |
| PP1beta H124N rev       | GATGCTAGCACACTCATTGTTTCCTCTTAAGAG                                        |                                             |

### References

- 1 Edgar, R. C. MUSCLE: multiple sequence alignment with high accuracy and high throughput. *Nucleic Acids Res* **32**, 1792-1797, doi:10.1093/nar/gkh340 (2004).
